# Supplementary material for: Mapping of QTLs Associated with Biological Nitrogen Fixation Traits in Peanuts (Arachis hypogaea L.) Using an Interspecific Population Derived from the Cross between the Cultivated Species and Its Wild Ancestors
Source: MDPI journal article supplement (doi:10.3390/genes14040797), 2023-03-26
Supplement: s1 [file s1]

## Supplementary Materials

**Table S1.** Summary of significant line × trait associations with their QTL effects identified in all treatments in 2017 environment

| CSSL     | Chromosome                | SPAD           |    |            | TB             |    |            |
|----------|---------------------------|----------------|----|------------|----------------|----|------------|
|          |                           | QTL effect (%) |    |            | QTL effect (%) |    |            |
|          |                           | -N             | +N | -N+ISRA400 | -N             | +N | -N+ISRA400 |
| 12CS_023 | A01                       | ns             | ns | ns         | ns             | ns | -48.76**   |
| 12CS_096 | A01                       | ns             | ns | ns         | ns             | ns | -61.13***  |
| 12CS_071 | A01                       | ns             | ns | ns         | ns             | ns | -41.65*    |
| 12CS_016 | A01, <b>B10</b>           | ns             | ns | ns         | ns             | ns | -58.32**   |
| 12CS_041 | A02                       | ns             | ns | ns         | -63.18*        | ns | ns         |
| 12CS_051 | A02, <b>A08, B02</b>      | ns             | ns | -65.29***  | ns             | ns | -71.51***  |
| 12CS_052 | A02, <b>B11</b>           | ns             | ns | ns         | ns             | ns | -62.55***  |
| 12CS_004 | A03                       | ns             | ns | -29.23***  | -64.24*        | ns | -71.95***  |
| 12CS_055 | A03                       | ns             | ns | ns         | -64.46*        | ns | ns         |
| 12CS_042 | A03                       | ns             | ns | ns         | -69.46*        | ns | -41.04*    |
| 12CS_027 | A04, <b>A07, B01, B02</b> | ns             | ns | -24.61*    | ns             | ns | -47.38**   |
| 12CS_098 | A04                       | ns             | ns | ns         | -65.18*        | ns | -48.53*    |
| 12CS_090 | A04, <b>A09</b>           | ns             | ns | ns         | ns             | ns | -45.74*    |
| 12CS_022 | A05                       | ns             | ns | ns         | ns             | ns | -47.87*    |
| 12CS_039 | A08, <b>B11</b>           | ns             | ns | ns         | ns             | ns | -39.73*    |
| 12CS_084 | A08, <b>A01</b>           | ns             | ns | -33.79***  | ns             | ns | -53.28**   |
| 12CS_028 | A09, <b>B10</b>           | ns             | ns | ns         | ns             | ns | -49.2*     |
| 12CS_106 | B01                       | ns             | ns | ns         | -61.4**        | ns | ns         |
| 12CS_044 | B02                       | ns             | ns | -47.89***  | ns             | ns | -66.09***  |
| 12CS_118 | B03, <b>A06, A09</b>      | ns             | ns | ns         | ns             | ns | -52.02*    |
| 12CS_059 | B04                       | ns             | ns | ns         | ns             | ns | -49.12**   |
| 12CS_063 | B06, <b>B10</b>           | ns             | ns | ns         | ns             | ns | -44.63**   |
| 12CS_076 | B06                       | ns             | ns | ns         | ns             | ns | -52.02**   |
| 12CS_060 | B06, <b>B08, A07</b>      | ns             | ns | -41.77***  | ns             | ns | -69.63***  |
| 12CS_047 | B06                       | ns             | ns | ns         | ns             | ns | -57.13***  |
| 12CS_081 | B07                       | ns             | ns | ns         | ns             | ns | -60.27**   |
| 12CS_048 | B07                       | ns             | ns | ns         | ns             | ns | -41.04*    |
| 12CS_006 | B08, <b>A01, B03</b>      | ns             | ns | ns         | ns             | ns | -50.57*    |
| 12CS_064 | B10                       | ns             | ns | ns         | ns             | ns | -47.1**    |

The values for SPAD (leaf chlorophyll content) and TB (total biomass) represent the relative difference (QTL effect) between the CSSLs and Fleur11. -N and +N treatments are respectively negative (without nitrogen) and positive (with urea) controls. -N+ISRA400 treatment: without nitrogen + inoculation with

*Bradyrhizobium vignae* Strain ISRA400. Chromosome indicates the linkage group which carries the target wild segment. Chromosomes mentioned in bold constitute supplementary wild segments that were not the initial targeted during the development of the CSSL population. \*, \*\* and \*\*\*: significant at  $p < 0.05$ ,  $p < 0.01$  and  $p < 0.001$  respectively, ns: not significant.

**Table S2.** Summary of significant line  $\times$  trait associations with their QTL effects identified in all treatments in 2018 environment

| CSSL     | Chromosome                                | SPAD           |    |            | TB             |         |            |
|----------|-------------------------------------------|----------------|----|------------|----------------|---------|------------|
|          |                                           | QTL effect (%) |    |            | QTL effect (%) |         |            |
|          |                                           | -N             | +N | -N+ISRA400 | -N             | +N      | -N+ISRA400 |
| 12CS_051 | A02, <b>A08</b> , <b>B02</b>              | ns             | ns | -43.26***  | ns             | ns      | -56.43*    |
| 12CS_004 | A03                                       | ns             | ns | -64.77***  | -52.79**       | ns      | -64.68**   |
| 12CS_072 | A03                                       | ns             | ns | ns         | -47.01**       | -37.21* | ns         |
| 12CS_103 | A03, <b>A08</b>                           | ns             | ns | -26.76***  | ns             | ns      | -60.58**   |
| 12CS_055 | A03                                       | ns             | ns | ns         | -47.11*        | ns      | ns         |
| 12CS_042 | A03                                       | ns             | ns | ns         | -49.57*        | ns      | ns         |
| 12CS_098 | A04                                       | ns             | ns | ns         | ns             | ns      | -55.10*    |
| 12CS_108 | A04, <b>B01</b>                           | ns             | ns | -22.79***  | -52.34**       | ns      | ns         |
| 12CS_086 | A04                                       | ns             | ns | ns         | -53.54***      | ns      | ns         |
| 12CS_022 | A05                                       | ns             | ns | ns         | -57.96***      | ns      | ns         |
| 12CS_121 | A06, <b>A10</b> , <b>B03</b> , <b>B08</b> | ns             | ns | ns         | -38.63*        | ns      | ns         |
| 12CS_092 | A07                                       | ns             | ns | ns         | -48.64**       | ns      | ns         |
| 12CS_062 | A07, <b>B10</b>                           | ns             | ns | ns         | ns             | ns      | -26.32***  |
| 12CS_034 | A07, <b>A03</b>                           | ns             | ns | ns         | -48.37*        | ns      | -52.76*    |
| 12CS_084 | A08, <b>A01</b>                           | ns             | ns | -61.67***  | ns             | ns      | -58.35*    |
| 12CS_028 | A09, <b>B10</b>                           | ns             | ns | -15.17**   | ns             | ns      | ns         |
| 12CS_031 | A09, <b>B10</b>                           | ns             | ns | ns         | -41.45**       | ns      | ns         |
| 12CS_018 | A09                                       | ns             | ns | ns         | -46.44*        | ns      | ns         |
| 12CS_078 | A10, <b>B03</b>                           | ns             | ns | ns         | -58.57***      | ns      | ns         |
| 12CS_106 | B01                                       | ns             | ns | ns         | -49.52*        | ns      | ns         |
| 12CS_119 | B02, <b>A01</b>                           | ns             | ns | ns         | -49.9**        | ns      | ns         |
| 12CS_044 | B02                                       | ns             | ns | -73.49***  | ns             | ns      | -55.36**   |
| 12CS_118 | B03, <b>A06</b> , <b>A09</b>              | ns             | ns | ns         | -57.93*        | ns      | -53.04*    |
| 12CS_001 | B03, <b>B01</b>                           | ns             | ns | ns         | -45.65*        | ns      | ns         |
| 12CS_059 | B04                                       | ns             | ns | ns         | -48.5*         | ns      | ns         |

|          |                      |    |      |    |          |    |         |
|----------|----------------------|----|------|----|----------|----|---------|
| 12CS_101 | B05, <b>A08</b>      | ns | ns   | ns | -55.69** | ns | ns      |
| 12CS_081 | B07                  | ns | ns   | ns | -41.91*  | ns | -57.06* |
| 12CS_079 | B09, <b>A10, B03</b> | ns | ns   | ns | -37.94*  | ns | ns      |
| 12CS_064 | B10                  | ns | ns   | ns | -41.47*  | ns | ns      |
| 12CS_066 | B10                  | ns | ns   | ns | -47.23*  | ns | ns      |
| 12CS_010 | B11                  | ns | 0.1* | ns | ns       | ns | ns      |

The values for SPAD (leaf chlorophyll content) and TB (total biomass) represent the relative difference (QTL effect) between the CSSLs and Fleur11. -N and +N treatments are respectively negative (without nitrogen) and positive (with urea) controls. -N+ISRA400 treatment: without nitrogen + inoculation with *Bradyrhizobium vignae* Strain ISRA400. Chromosome indicates the linkage group which carries the target wild segment. Chromosomes mentioned in bold constitute supplementary wild segments that were not the initial targeted during the development of the CSSL population. \*, \*\* and \*\*\*: significant at  $p < 0.05$ ,  $p < 0.01$  and  $p < 0.001$  respectively, ns: not significant.

**Table S3.** Characteristics of the QTLs associated to leaf chlorophyll content and total biomass in inoculated treatment

| Trait | LG  | 2017            |              |                | 2018            |              |                |
|-------|-----|-----------------|--------------|----------------|-----------------|--------------|----------------|
|       |     | Closest markers |              | Conf. Int (cM) | Closest markers |              | Conf. Int (cM) |
| SPAD  | A02 | Seq12E03_A      | RM2H10_A     | 43.85-55.35    | Seq12E03_A      | RM2H10_A     | 43.85-55.35    |
|       | A03 | TC4G02_A        | Ah-30_A      | 0-16.6         | TC4G02_A        | Ah-30_A      | 0-16.6         |
|       | A03 | .               | .            | .              | gi-4925_A       | PM238_A      | 57.2-74.2      |
|       | A04 | RN12E01_A       | TC9E08_A2    | 0-48.975       | .               | .            | .              |
|       | A04 |                 |              |                | TC9E08_A2       | TC9E08_A1    | 48.975-90.975  |
|       | A07 | Ah3TC23E04_A    | PM042_A1     | 12.1-28.525    | .               | .            | .              |
|       | A07 | .               | .            | .              | PM042_A1        | TC9H08_A     | 28.525-60.0    |
|       | A08 | .               | .            | .              | RM5G08_A        | Ad90F2_A     | 46.15-75.525   |
|       | A08 | Ad90F2_A        | TC1E05_A     | 75.525-85.375  | Ad90F2_A        | TC1E05_A     | 75.525-85.375  |
|       | A09 | .               | .            | .              | TC9B07_A        | seq4G02_A    | 7.125-49.375   |
|       | B01 | .               | .            | .              | Ah-3_B          | Seq19H03_B2  | 66.725-87.525  |
|       | B02 | Seq1B09_B       | Ah3TC13E05_B | 24.55-43.25    | Seq1B09_B       | Ah3TC13E05_B | 24.55-43.25    |
|       | B06 | TC3H07_B        | Ah3TC19F05_B | 16.275-50.95   | .               | .            | .              |
|       | B08 | Ad90F2_B        | IPAHM229_B   | 5.25-21.25     | .               | .            | .              |
|       | B10 | AC2B03_B        | AC2B03_B     | 48.025-55.525  | .               | .            | .              |
| TB    | A01 | TC2E05_A        | IPAHM287_A   | 0-9.675        | .               | .            | .              |

|     |              |              |                 |             |              |               |
|-----|--------------|--------------|-----------------|-------------|--------------|---------------|
| A01 | seq16G08_A   | seq16G08_A   | 42.325-47.7     | .           | .            | .             |
| A01 | Seq4A06_A    | TC3H02_A     | 111.125-119.975 | .           | .            | .             |
| A02 | RM2H10_A     | RM2H10_A     | 55.35-63.125    | .           | .            | .             |
| A02 | .            | .            | .               | Seq12E03_A  | RM2H10_A     | 43.85-55.35   |
| A03 | .            | .            | .               | gi-4925_A   | PM238_A      | 57.2-74.2     |
| A04 | TC9E08_A1    | TC11B04_A1   | 90.975-113.15   | .           | .            | .             |
| A04 | .            | .            | .               | Seq18A08_A3 | TC9E08_A1    | 57.625-90.975 |
| A05 | gi-0620_A    | Ah-614_A     | 0-46.8          | .           | .            | .             |
| A06 | TC11A04_A    | TC11A04_A    | 29.825-43.925   | .           | .            | .             |
| A08 | .            | .            | .               | RM5G08_A    | Ad90F2_A     | 46.15-75.525  |
| A08 | Ad90F2_A     | TC1E05_A     | 75.525-85.375   | Ad90F2_A    | TC1E05_A     | 75.525-85.375 |
| A09 | TC9B07_A     | seq4G02_A    | 7.125-49.375    | .           | .            | .             |
| A09 | RN35H04_A    | gi-1107_A    | 72.1-96.1       | .           | .            | .             |
| B02 | Seq1B09_B    | Ah3TC13E05_B | 24.55-43.25     | Seq1B09_B   | Ah3TC13E05_B | 24.55-43.25   |
| B03 | TC7E04_B     | IPAHM093_B   | 1.725-22.575    | .           | .            | .             |
| B04 | IPAHM108_B   | Ah3TC12A01_  | 40.875-57.225   | .           | .            | .             |
|     |              | B            |                 |             |              |               |
| B06 | PM137_B      | Ah3TC19F05_B | 31.3-50.95      | .           | .            | .             |
| B07 | seq2E06_B    | seq2E06_B    | 0-2.05          | .           | .            | .             |
| B07 | Seq5D05_B    | Seq5D05_B    | 14.5-21.275     | .           | .            | .             |
| B08 | Ah3TC31E08_B | Ah3TC31E08_B | 26.95-29.8      | .           | .            | .             |
| B10 | Ah3TC22G05_  | Ah3TC22G05_  | 0-8.5           | .           | .            | .             |
|     | B            | B            |                 |             |              |               |
| B10 | AC2B03_B     | AC2B03_B     | 48.025-55.525   | .           | .            | .             |
| B11 | TC3E02_B     | Ah3TC23E04_B | 0-15.1          | .           | .            | .             |

---

SPAD: leaf chlorophyll content; TB: total biomass. LG indicates the linkage group which carries the wild segment responsible for the phenotype. Conf. Int represents the confidence interval of the QTL on the chromosome.

**Table S4.** Orthologs of nodulation genes located on the regions containing the QTLs

| CSSLs    | Phenotype description                        | QTL position               |                    | Candidate genes |                                                                                                                                                                                                                   |                           |  |
|----------|----------------------------------------------|----------------------------|--------------------|-----------------|-------------------------------------------------------------------------------------------------------------------------------------------------------------------------------------------------------------------|---------------------------|--|
|          |                                              | Chromosome                 | Gene name          | Ortholog genes  | Description                                                                                                                                                                                                       | Symbiotic functional role |  |
|          |                                              | (start-end pb)             |                    |                 |                                                                                                                                                                                                                   |                           |  |
| 12CS_004 | Decreases SPAD, TB, ARA, NDW, NN, and NDW/NN | A03: 121100027 - 127945426 | <i>Aradu.51WYZ</i> | <i>MtGS1-2</i>  | Plastid localized enzyme essential in nitrogen metabolism nodules                                                                                                                                                 | Not defined               |  |
|          |                                              |                            | <i>Aradu.WG73C</i> | <i>LjSIE3</i>   | Enzyme (Ligase, CTLH/CRA C-terminal to LisH motif domain). Downregulation of <i>LjSIE3</i> inhibits infection thread development and nodule organogenesis.                                                        | Early Signaling           |  |
|          |                                              |                            | <i>Aradu.P8MSW</i> | <i>LjSYMRK</i>  | Enzyme (Kinase; Leucine rich repeat N-terminal domain). <i>LjSYMRK</i> mutants are unable to form root nodules and arbuscular mycorrhiza. They exhibit root hairs deformation, but no infection thread formation. | Early Signaling           |  |
|          |                                              |                            | <i>Aradu.J0SGA</i> | <i>LjEPR3</i>   | Enzyme (Protein kinase domain) controlling the rhizobial infection. <i>LjEPR3</i> plant mutants are defective in perception of bacterial exopolysaccharides.                                                      | Early Signaling           |  |

|          |                                     |                          |                    |                     |                                                                                                                                                 |                                                                                                                                                                   |                      |
|----------|-------------------------------------|--------------------------|--------------------|---------------------|-------------------------------------------------------------------------------------------------------------------------------------------------|-------------------------------------------------------------------------------------------------------------------------------------------------------------------|----------------------|
|          |                                     |                          |                    | <i>Aradu.L8SVN</i>  | <i>MtNAC969</i>                                                                                                                                 | Transcription factor (NAC domain). RNAi of <i>MtNAC969</i> induces the accumulation of amyloplasts in the nitrogen-fixing zone and leads to nodule senescence     | Senescence           |
|          |                                     |                          |                    | <i>Aradu.JZT13</i>  | <i>GmINS1</i>                                                                                                                                   | Cell wall component (Trehalose-phosphate synthase). Overexpression of <i>GmINS1</i> increases nodule number and infection cell abundance.                         | Nodule organogenesis |
|          |                                     |                          |                    | <i>Aradu.UYZ93</i>  | <i>MtCRE1</i>                                                                                                                                   | Enzyme (Histidine kinase, Bacterial sensor protein C-terminal signature). RNAi of <i>MtCRE1</i> increases number of lateral roots and strongly reduces nodulation | Nodule organogenesis |
| 12CS_044 | Decreases SPAD, TB, ARA, and NDW/NN | B02: 41413540 - 77881439 | <i>Araip.QVW26</i> | <i>GmPT5/7</i>      | Phosphate transporter. Overexpression or knockdown Of <i>GmPT5</i> in soybean mutants affect nodulation and plant growth.                       | Nodule functioning                                                                                                                                                |                      |
|          |                                     |                          | <i>Araip.5U4XM</i> | <i>MtVAMP721d/e</i> | Membrane protein (Vesicle trafficking). Silencing of MtVAMP had a minor effect in nodulation, but blocks the formation of symbiosome as well as | Symbiosome formation                                                                                                                                              |                      |

|          |                                                                        |                          |                    |                     |                                                                                                                                                                                              |                                                                                                                                                                |                      |
|----------|------------------------------------------------------------------------|--------------------------|--------------------|---------------------|----------------------------------------------------------------------------------------------------------------------------------------------------------------------------------------------|----------------------------------------------------------------------------------------------------------------------------------------------------------------|----------------------|
|          |                                                                        |                          |                    |                     |                                                                                                                                                                                              | arbuscule formation in mycorrhizal symbiosis                                                                                                                   |                      |
|          |                                                                        |                          |                    | <i>Araip.RJS33</i>  | <i>MtNOOT</i>                                                                                                                                                                                | Transcription factor (BLADE-ON-PETIOLE family). <i>M. truncatula</i> mutants exhibit one or multiple roots in an apical position on the fully developed nodule | Nodule organogenesis |
|          |                                                                        |                          |                    | <i>Araip.X1RXQ</i>  | <i>LjFEN1</i>                                                                                                                                                                                | Enzyme (Homocitrate Synthase). <i>L. japonicus</i> mutants form morphologically normal but, ineffective nodules                                                | Bacterial maturation |
| 12CS_051 | Decreases SPAD, TB, and NDW, and induces the collapse of nodule tissue | A02: 30278634 - 66574828 | <i>Aradu.ZC0SW</i> | <i>GmPT5/7</i>      | Phosphate transporter. Overexpression or knockdown Of <i>GmPT5</i> in soybean mutants affect nodulation and plant growth.                                                                    | Nodule functioning                                                                                                                                             |                      |
|          |                                                                        |                          | <i>Aradu.Q6WYU</i> | <i>MtVAMP721d/e</i> | Membrane protein (Vesicle trafficking). Silencing of MtVAMP had a minor effect in nodulation, but blocks the formation of symbiosome as well as arbuscule formation in mycorrhizal symbiosis | Symbiosome formation                                                                                                                                           |                      |
|          |                                                                        |                          | <i>Aradu.31ZLJ</i> | <i>MtNOOT</i>       | Transcription factor (BLADE-ON-PETIOLE family). <i>M. truncatula</i> mutants                                                                                                                 | Nodule organogenesis                                                                                                                                           |                      |

|          |                       |                             |                    |                |                                                                                                                                                                                |                      |
|----------|-----------------------|-----------------------------|--------------------|----------------|--------------------------------------------------------------------------------------------------------------------------------------------------------------------------------|----------------------|
|          |                       |                             | <i>Aradu.F9JCM</i> | <i>LjFEN1</i>  | exhibit one or multiple roots in an apical position on the fully developed nodule                                                                                              |                      |
|          |                       |                             |                    |                | Enzyme (Homocitrate Synthase). <i>L. japonicus</i> mutants form morphologically normal but, ineffective nodules                                                                | Bacterial maturation |
| 12CS_084 | Decreases SPAD and TB | A08: 35192648<br>- 40925213 | <i>Aradu.GZF8P</i> | <i>MtPNO1</i>  | RNA-binding pno1-like protein. <i>M. truncatula</i> mutants produce approximately 60% of the number of nodules on wild-type plants.                                            | Nodule organogenesis |
|          |                       |                             | <i>Aradu.3LM76</i> | <i>LjMATE1</i> | Transporter (Citrate). <i>LjMATE1</i> knockdown line produces small nodule than the wild plant, and low nitrogenase activity as well as the expression level of leghemoglobin. | Nodule functioning   |

SPAD: leaf chlorophyll content, TB: total biomass, NDW: nodule dry weight, NN: nodule number, ARA: acetylene reduction assay. Information regarding the description and symbiotic function of these ortholog genes are well reviewed by Roy et al. [29].



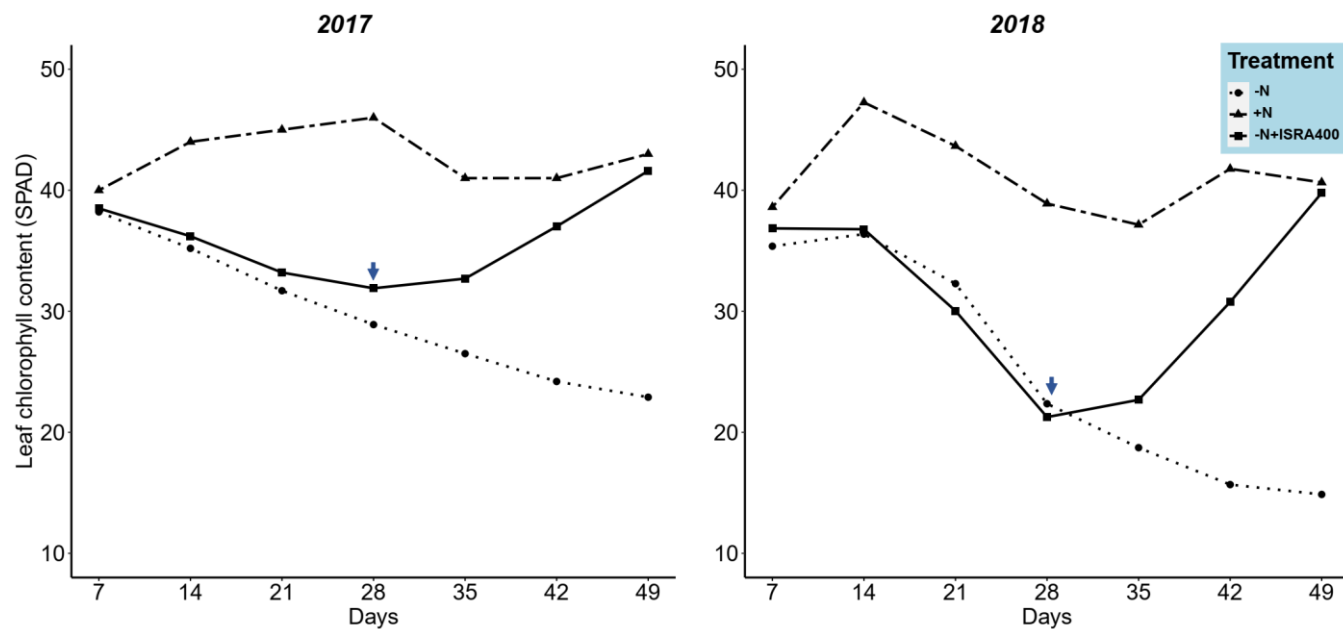

**Figure S1.** Kinetic of average leaf chlorophyll content in the CSSL population during 49 days after inoculation in shade house experiments. -N and +N treatments are respectively negative (without nitrogen) and positive (with urea) controls. -N+ISRA400 treatment: without nitrogen + inoculation with *Bradyrhizobium vignae* Strain ISRA400. Arrow indicates the start of biological nitrogen fixation.

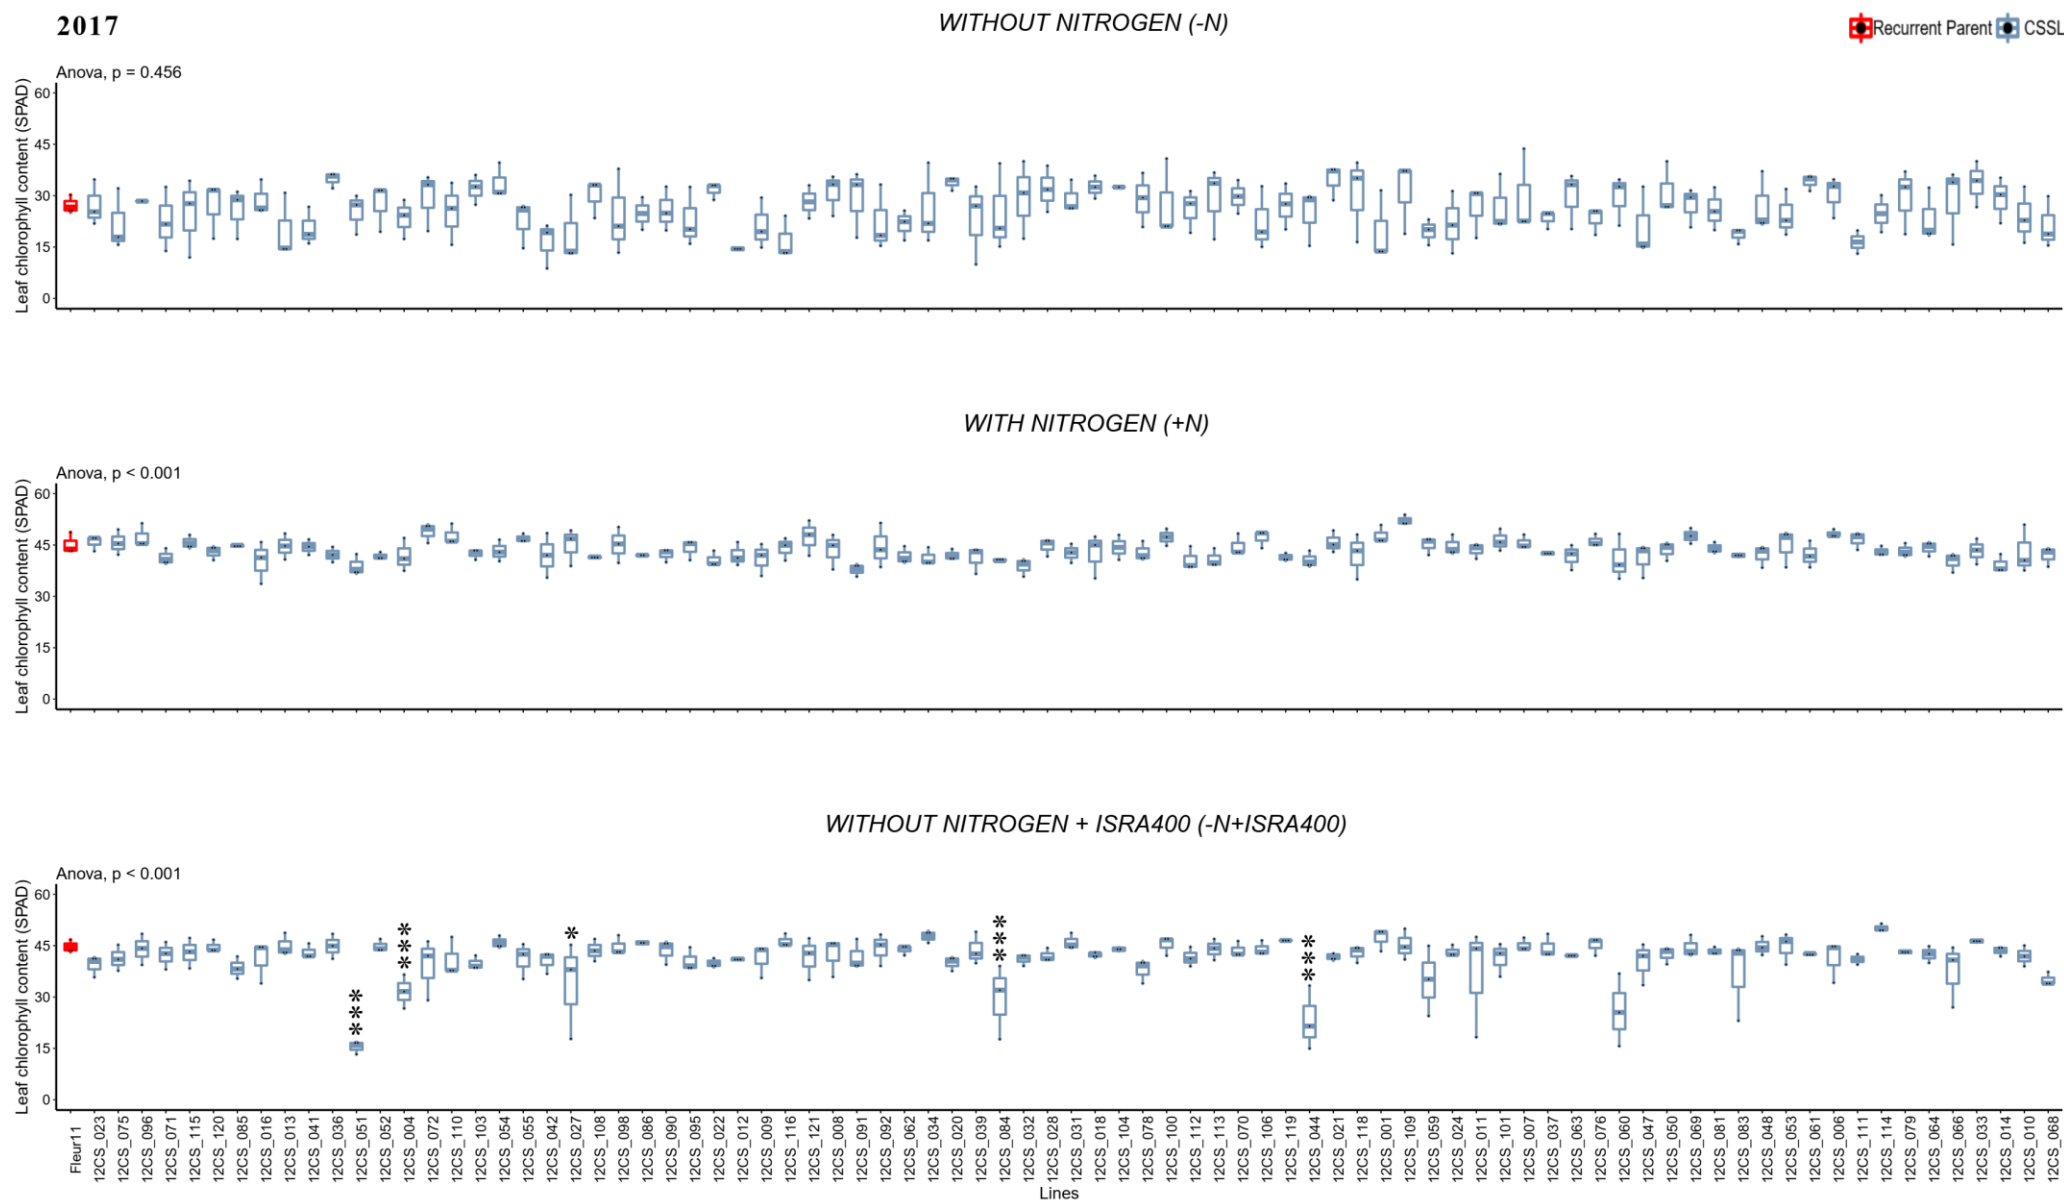

**Figure S2.** Significant line  $\times$  leaf chlorophyll content associations observed between Fleur and CSSLs in the 2017 shade house experiment. Without nitrogen and with nitrogen indicate respectively negative and positive controls. -N+ISRA400 treatment: without nitrogen + inoculation with *Bradyrhizobium vignae* Strain ISRA400. \*, \*\* and \*\*\*: significant at  $p < 0.05$ ,  $p < 0.01$  and  $p < 0.001$  respectively using Dunnett multiple comparisons test.

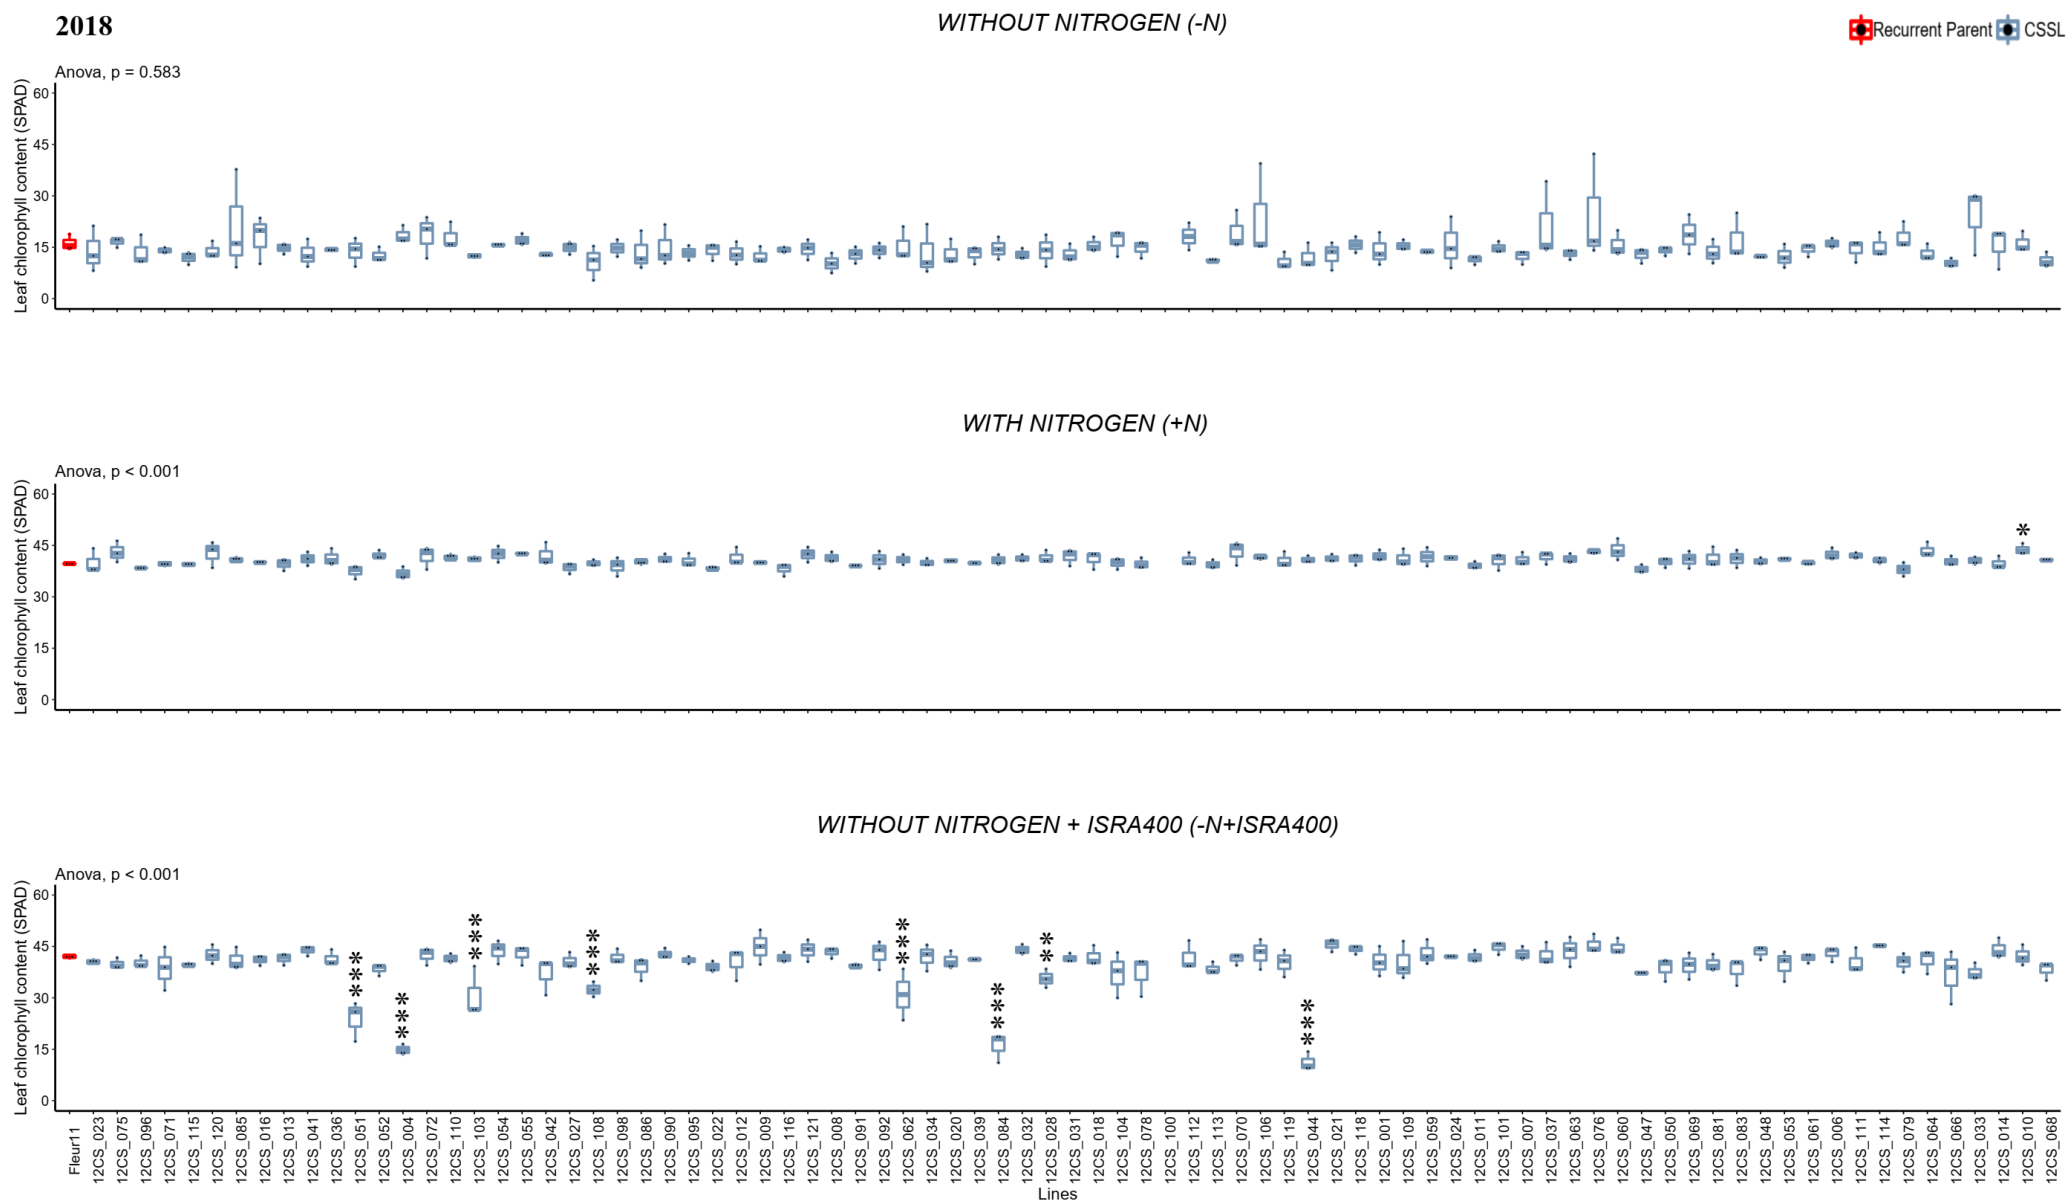

**Figure S3.** Significant line  $\times$  leaf chlorophyll content associations observed between Fleur and CSSLs in the 2018 shade house experiment. Without nitrogen and with nitrogen indicate respectively negative and positive controls. -N+ISRA400 treatment: without nitrogen + inoculation with *Bradyrhizobium vignae* Strain ISRA400. \*, \*\* and \*\*\*: significant at  $p < 0.05$ ,  $p < 0.01$  and  $p < 0.001$  respectively using Dunnett multiple comparisons test.

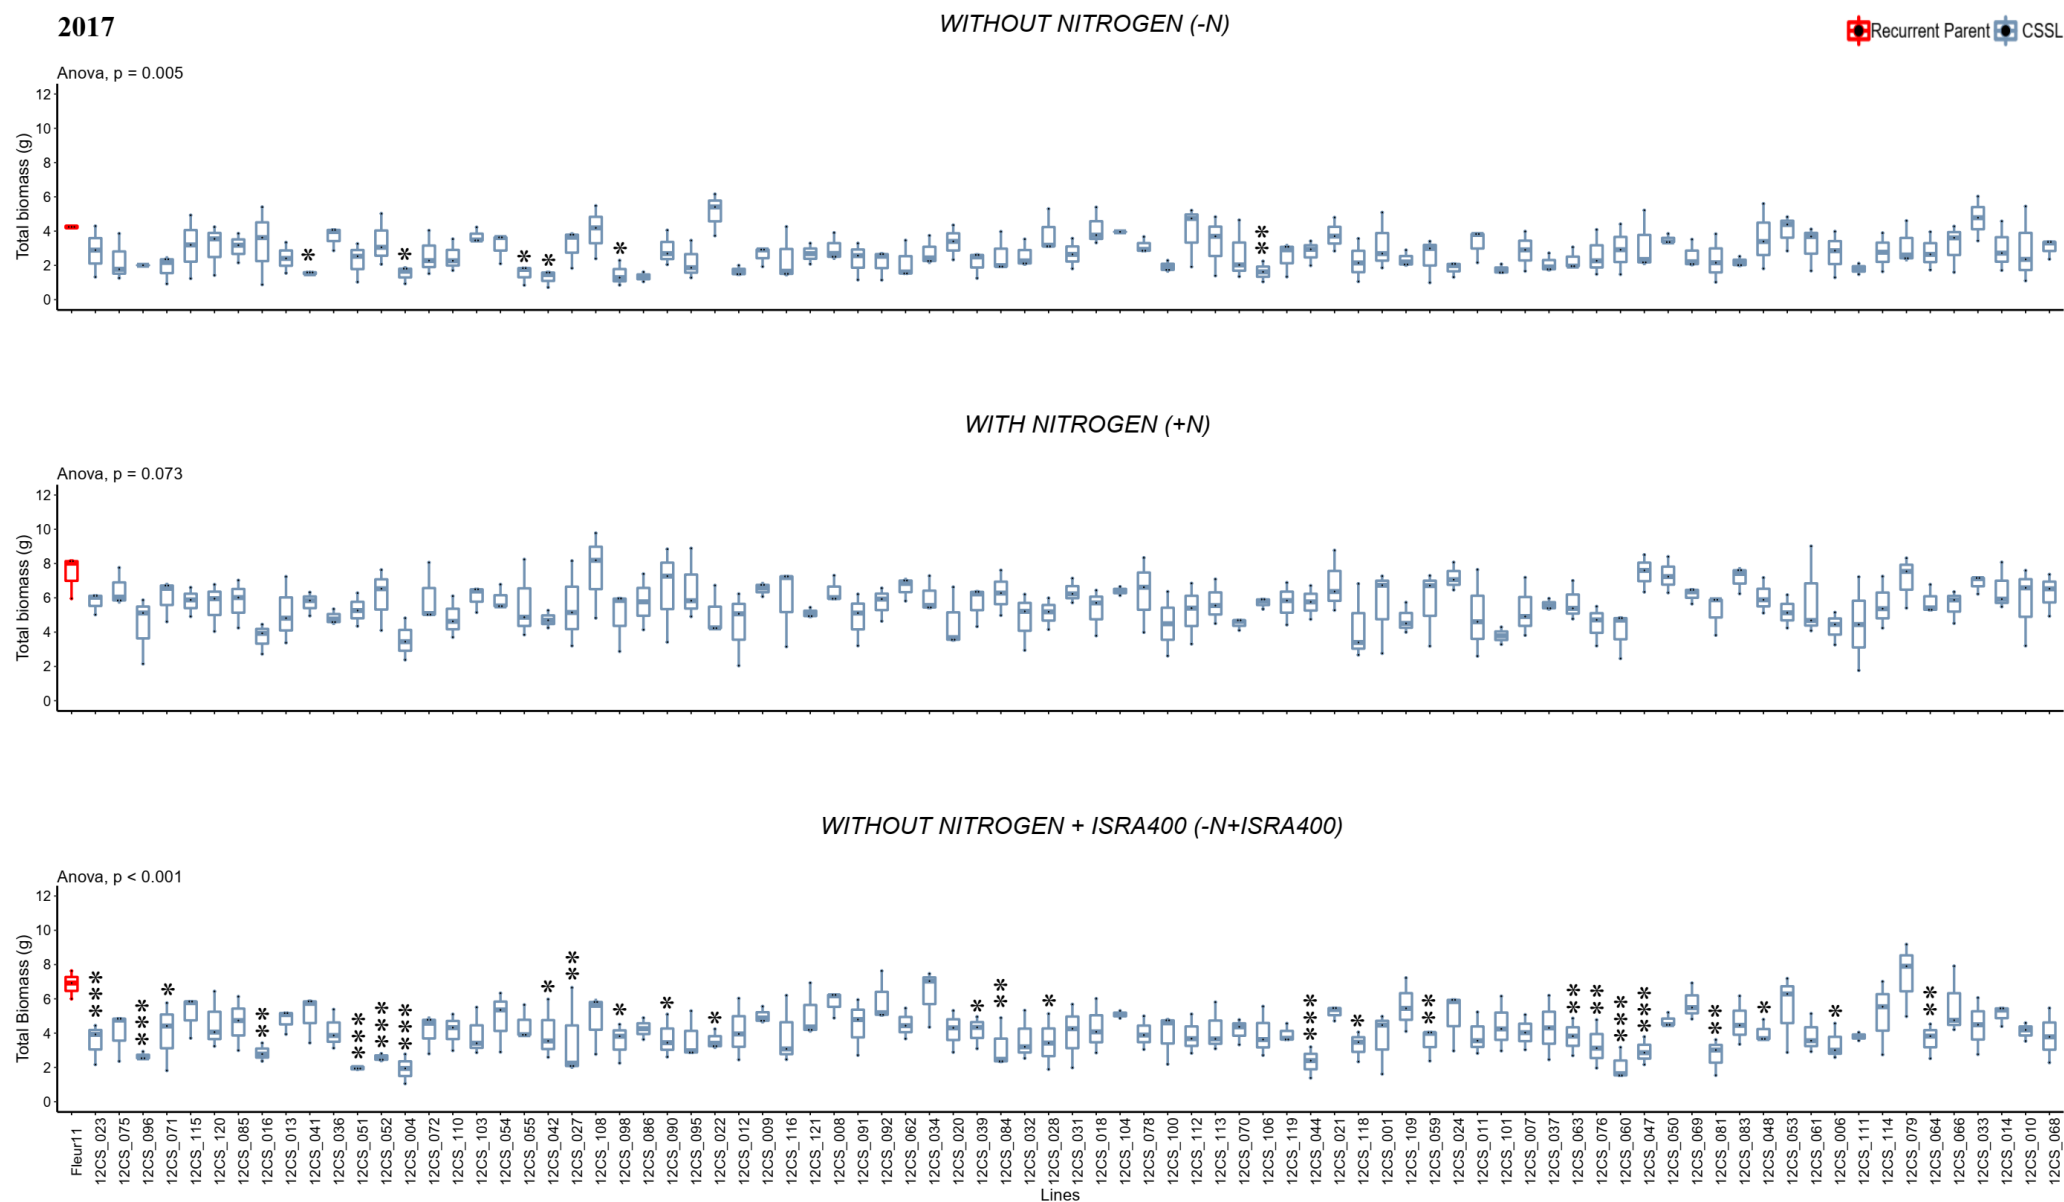

**Figure S4.** Significant line  $\times$  total biomass associations observed between Fleur and CSSLs in the 2017 shade house experiment. Without nitrogen and with nitrogen indicate respectively negative and positive controls. -N+ISRA400 treatment: without nitrogen + inoculation with *Bradyrhizobium vignae* Strain ISRA400. \*, \*\* and \*\*\*: significant at  $p < 0.05$ ,  $p < 0.01$  and  $p < 0.001$  respectively using Dunnett multiple comparisons test.

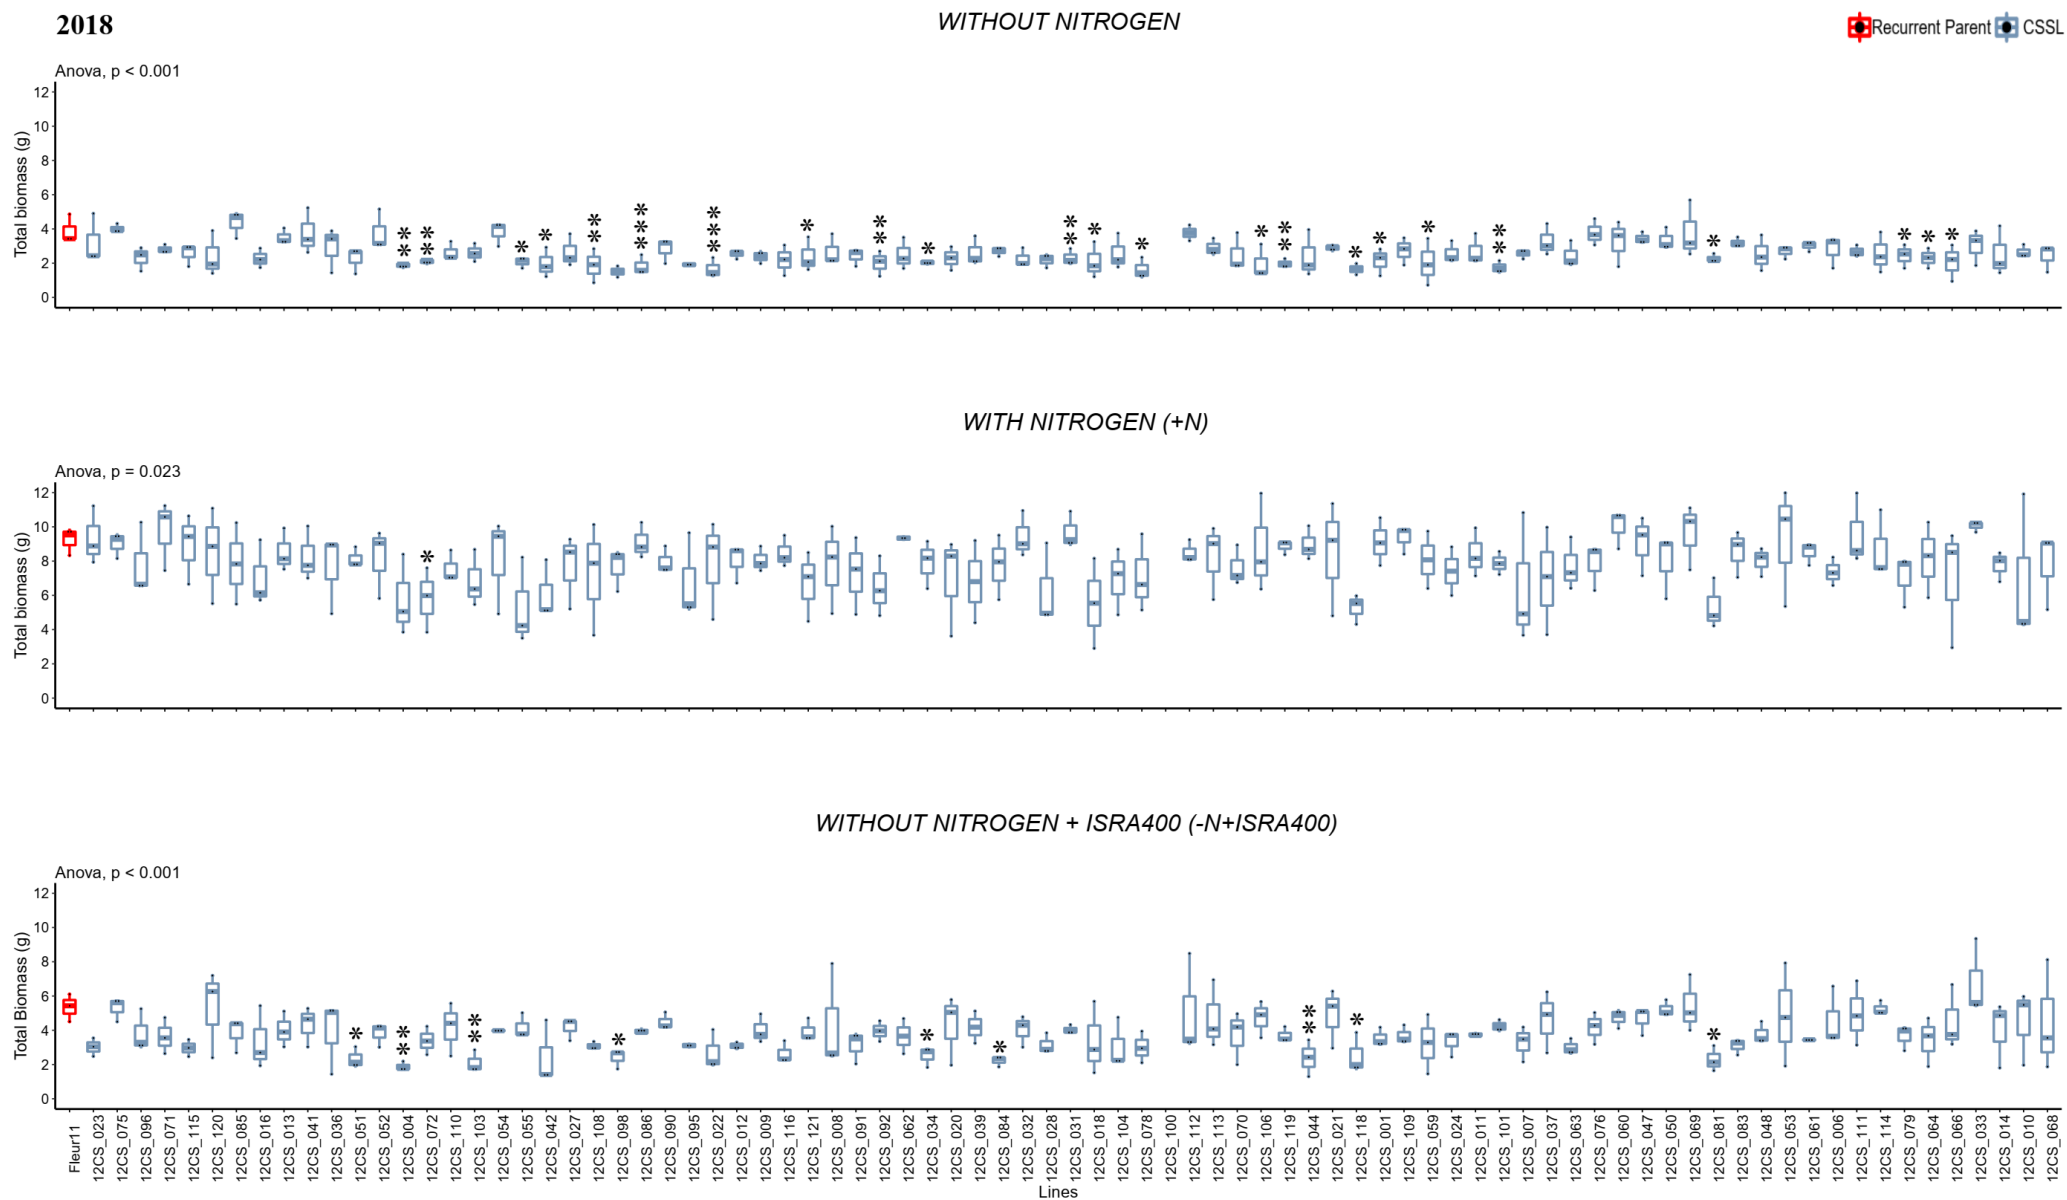

**Figure S5.** Significant line  $\times$  total biomass associations observed between Fleur and CSSLs in the 2018 shade house experiment. Without nitrogen and with nitrogen indicate respectively negative and positive controls. -N+ISRA400 treatment: without nitrogen + inoculation with *Bradyrhizobium vignae* Strain ISRA400. \*, \*\* and \*\*\*: significant at  $p < 0.05$ ,  $p < 0.01$  and  $p < 0.001$  respectively using Dunnett multiple comparisons test.
